# Supplementary material for: Nitrogen substitution improves the mobility and stability of electron transport materials for inverted perovskite solar cells
Source: Royal Society of Chemistry journal article supplement (doi:10.1039/c8nr05588b), 2018-01-01
Supplement: c8nr05588b1.pdf [file c8nr05588b1.pdf]

## **ELECTRONIC SUPPLEMENTARY INFORMATION**

### **Improving mobility and stability of electron transport materials for inverted perovskite solar cells by nitrogen substitution**

Rui Zhu, Quan-Song Li\*, Ze-Sheng Li\*

*Key Laboratory of Cluster Science of Ministry of Education, Beijing Key Laboratory of Photoelectronic/Electrophotonic Conversion Materials, School of Chemistry and Chemical Engineering, Beijing Institute of Technology, 100081 Beijing, China*

## Contents

|                                                                                                                                                                                                                                               |   |
|-----------------------------------------------------------------------------------------------------------------------------------------------------------------------------------------------------------------------------------------------|---|
| <b>Table ESI1</b> Energies ( $E$ , au) of the studied compounds optimized by B3LYP/6-31+g (d, p) in dichloromethane .....                                                                                                                     | 1 |
| <b>Table ESI2</b> The bond length changes (BLC) between TDTP and designed molecules and the sum of absolute value of BLC ( $\Sigma \Delta R $ ) .....                                                                                         | 2 |
| <b>Table ESI3</b> The calculated HOMO level (eV), excitation energies ( $E_g$ , eV) and LUMO level of TDTP derivatives.....                                                                                                                   | 3 |
| <b>Fig. ESI1</b> Structure comparison of TDTP-2a, TDTP-2b, TDTP-3a, and TDTP-3b, and the two orbitals with the most contributions of lone pair electrons of nitrogen atoms in thiazole and thiadiazole of TDTP-2a and TDTP-3a .....           | 4 |
| <b>Fig. ESI2</b> The dimer structure of path 4 in TDTP-3b and the interactions marked by dashed line .                                                                                                                                        | 5 |
| <b>Fig. ESI3</b> The optimized configurations of TDTP-based ETMs adsorbed on the MAI- terminated perovskite surface, together with the corresponding adsorption energy ( $E_{ads}$ ). The dashed lines indicate the key H...N distances. .... | 6 |
| <b>Fig. ESI4</b> Charge density difference for the TDTP-based ETMs adsorbed on the MAI-terminated perovskite surface, where the yellow color represents charge depletion and the blue color identifies charge accumulation. ....              | 7 |
| Coordinates of the studied compounds optimized by B3LYP/6-31+g (d, p) in dichloromethane ....                                                                                                                                                 | 8 |

**Table ESII** Energies ( $E$ , au) of the studied compounds optimized by B3LYP/6-31+g (d, p) in dichloromethane

| Compounds | $E$        |
|-----------|------------|
| TDTP      | - 2599.778 |
| TDTP-1    | - 2710.484 |
| TDTP-2a   | - 2631.866 |
| TDTP-2b   | - 2631.876 |
| TDTP-3a   | - 2742.570 |
| TDTP-3b   | - 2742.583 |

**Table ESI2** The bond length changes (BLC) between TDTP and designed molecules and the sum of absolute value of BLC ( $\Sigma|\Delta R|$ )

|                    | TDTP | TDTP-1   | TDTP-2a  | TDTP-2b  | TDTP-3a  | TDTP-3b  |
|--------------------|------|----------|----------|----------|----------|----------|
| 1                  | 0    | -0.00066 | -0.00052 | -0.00062 | -0.00053 | -0.0005  |
| 2                  | 0    | 9E-05    | 0.00086  | 0.00061  | 0.00088  | 0.00052  |
| 3                  | 0    | 0.00016  | -0.00032 | -6E-05   | -0.00053 | -1E-04   |
| 4                  | 0    | 1E-05    | -0.00013 | 0.00012  | -4E-05   | 9E-05    |
| 5                  | 0    | 0.00012  | -5E-05   | -7E-05   | -2E-05   | -3E-05   |
| 6                  | 0    | 6E-05    | 0.00015  | 1E-05    | 0.00021  | 2E-05    |
| 7                  | 0    | 0.00021  | 0.00027  | 0.00018  | 0.00036  | 0.00023  |
| 8                  | 0    | -0.00019 | -0.00057 | -0.00051 | -0.0005  | -0.0004  |
| 9                  | 0    | -0.00012 | -0.0014  | -0.00056 | -0.00183 | -0.00071 |
| 10                 | 0    | -0.00024 | 0.00376  | 0.00238  | 0.00427  | 0.00227  |
| 11                 | 0    | -0.0003  | 0.00159  | 0.00039  | 0.00185  | 0.00056  |
| 12                 | 0    | -0.00037 | -0.0028  | -0.00182 | -0.00277 | -0.00157 |
| 13                 | 0    | 0.00018  | -0.0065  | -0.00206 | -0.00744 | -0.00225 |
| 14                 | 0    | 0.00064  | -0.00668 | -0.00195 | -0.00769 | -0.00251 |
| 15                 | 0    | 0.00057  | -0.00129 | -0.0018  | -0.00136 | -0.00187 |
| 16                 | 0    | -0.00043 | 0.0007   | -0.00047 | 0.00105  | -0.00011 |
| 17                 | 0    | 0.00051  | -0.00051 | -0.00016 | -0.0006  | 6E-05    |
| $\Sigma \Delta R $ | 0    | 0.005    | 0.028    | 0.014    | 0.032    | 0.014    |

**Table ESI3** The calculated HOMO level (eV), excitation energies ( $E_g$ , eV) and LUMO level of TDTP derivatives

| Compounds | HOMO  | $E_g$ | LUMO  |
|-----------|-------|-------|-------|
| TDTP      | -5.67 | 1.62  | -4.05 |
| TDTP-1    | -5.64 | 1.63  | -4.02 |
| TDTP-2a   | -6.15 | 1.93  | -4.21 |
| TDTP-2b   | -6.13 | 1.93  | -4.19 |
| TDTP-3a   | -6.00 | 1.80  | -4.20 |
| TDTP-3b   | -5.93 | 1.78  | -4.15 |

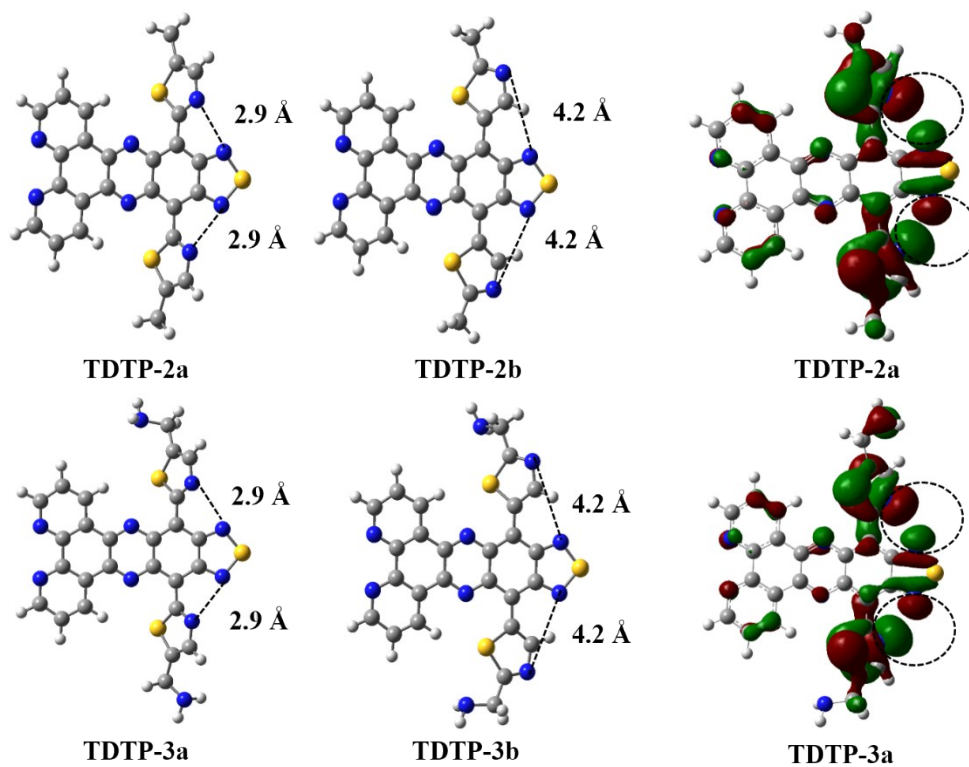

**Fig. ESI1** Structure comparison of TDTP-2a, TDTP-2b, TDTP-3a, and TDTP-3b, and the two orbitals with the most contributions of lone pair electrons of nitrogen atoms in thiazole and thiadiazole of TDTP-2a and TDTP-3a.

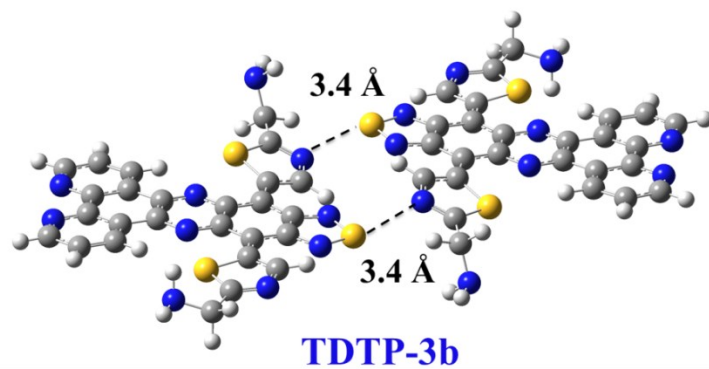

**Fig. ESI2** The dimer structure of path 4 in TDTP-3b and the interactions marked by dashed line.

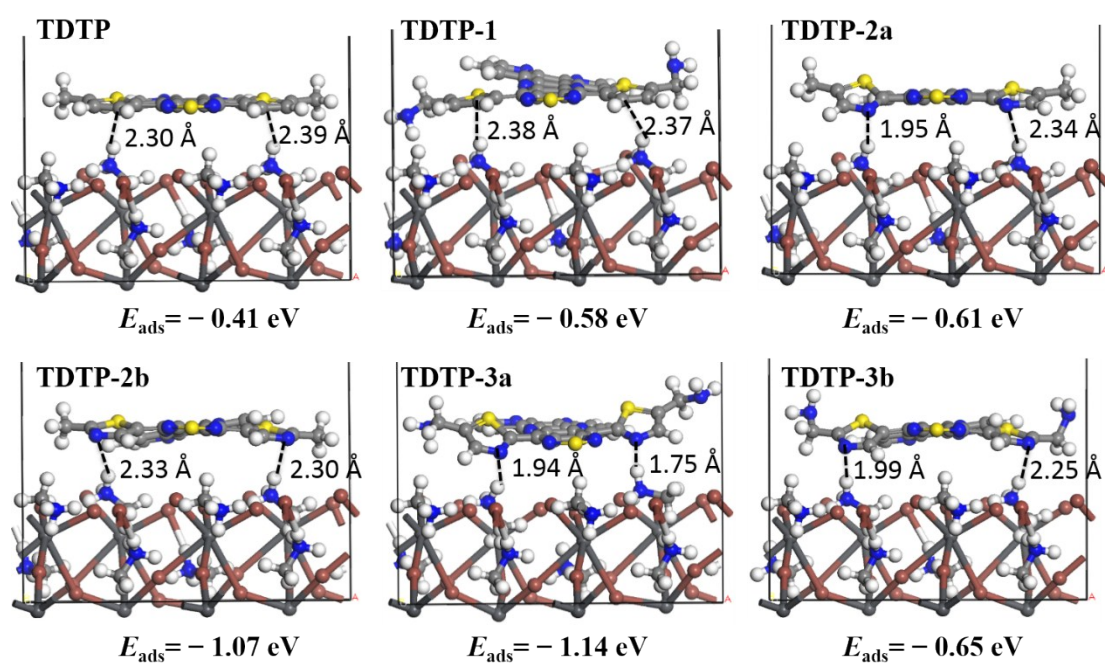

**Fig. ES13** The optimized configurations of TDTP-based ETMs adsorbed on the MAI-terminated perovskite surface, together with the corresponding adsorption energy ( $E_{\text{ads}}$ ). The dashed lines indicate the key H...N distances.



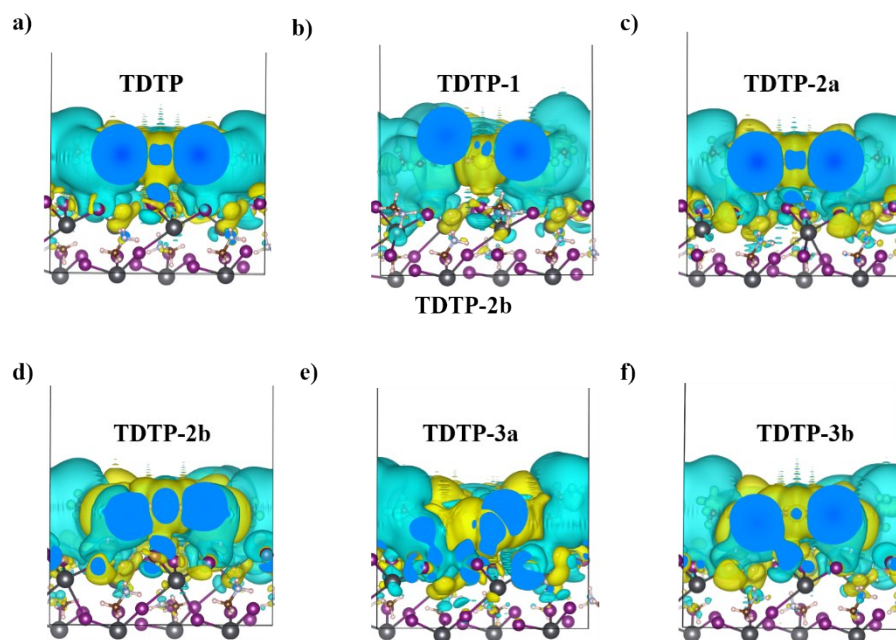

**Fig. ESI4** Charge density difference for the TDTP-based ETMs adsorbed on the MAI-terminated perovskite surface, where the yellow color represents charge depletion and the blue color identifies charge accumulation.

Coordinates of the studied compounds optimized by B3LYP/6-31+g (d, p) in dichloromethane

| TDTP |             |             | TDTP-1      |   |             |             |             |
|------|-------------|-------------|-------------|---|-------------|-------------|-------------|
| C    | 0.73512605  | -3.02940023 | -0.12941301 | C | -0.99307000 | -2.90252900 | 0.02722000  |
| C    | 1.50290211  | -1.82476814 | -0.12064701 | C | -1.63856300 | -1.62900400 | 0.08985100  |
| C    | 0.73095006  | -0.63266005 | -0.10017501 | C | -0.75440500 | -0.51785500 | 0.05009200  |
| C    | -0.72933206 | -0.63442205 | -0.10046201 | C | 0.69143200  | -0.66059400 | -0.09318500 |
| C    | -1.49855911 | -1.82831014 | -0.11984601 | C | 1.34101800  | -1.92229800 | -0.13233100 |
| C    | -0.72801205 | -3.03113523 | -0.12880401 | C | 0.46107700  | -3.04495700 | -0.06001000 |
| C    | -0.72408906 | 1.68766713  | -0.09858901 | C | 0.90448400  | 1.64999500  | -0.14790600 |
| C    | 0.72003006  | 1.68946213  | -0.09667501 | C | -0.51212900 | 1.79038800  | 0.09349600  |
| C    | 1.44259211  | 2.96316023  | -0.10446901 | C | -1.08912000 | 3.12543500  | 0.25824200  |
| C    | 0.73486905  | 4.18924632  | -0.09105001 | C | -0.27925100 | 4.27790800  | 0.11463500  |
| C    | -0.74546306 | 4.18732832  | -0.09476501 | C | 1.16021300  | 4.13483000  | -0.20021700 |
| C    | -1.44993011 | 2.95942523  | -0.11023801 | C | 1.73118500  | 2.84523400  | -0.32320100 |
| C    | -2.71253021 | 5.38725543  | -0.11228001 | C | 3.18583400  | 5.14063700  | -0.63888300 |
| C    | -3.49889127 | 4.22573832  | -0.13834301 | C | 3.84279500  | 3.90909000  | -0.78042900 |
| C    | -2.85536222 | 2.99914223  | -0.13857601 | C | 3.10217700  | 2.74927700  | -0.62133900 |
| H    | -3.18425024 | 6.36763947  | -0.10963501 | H | 3.73609100  | 6.07124000  | -0.76059800 |
| H    | -4.58123335 | 4.29566033  | -0.15931601 | H | 4.90209200  | 3.87545300  | -1.01171400 |
| H    | -3.41081626 | 2.06917516  | -0.16017801 | H | 3.55498600  | 1.76983500  | -0.72217800 |
| C    | 2.84802122  | 3.00661323  | -0.12648201 | C | -2.45038100 | 3.30185500  | 0.56400900  |
| C    | 3.48833327  | 4.23488932  | -0.12191101 | C | -2.95135500 | 4.58548200  | 0.70659200  |
| C    | 2.69884521  | 5.39432942  | -0.09779801 | C | -2.06957100 | 5.66402300  | 0.54071000  |
| H    | 3.40602226  | 2.07814816  | -0.14660701 | H | -3.08327000 | 2.43029900  | 0.68339200  |
| H    | 4.57057335  | 4.30764333  | -0.13792001 | H | -3.99528400 | 4.76134300  | 0.94337800  |
| H    | 3.16799624  | 6.37592750  | -0.09149501 | H | -2.42855100 | 6.68550200  | 0.64717300  |
| S    | 0.00625700  | -5.32084840 | -0.07547501 | S | -0.48850200 | -5.25436000 | -0.00749300 |
| C    | -5.43430141 | -1.47769511 | 0.27599902  | C | 5.30072400  | -1.93130300 | -0.03584700 |
| C    | -5.15775339 | -2.67312020 | -0.34569103 | C | 2.78436800  | -2.09482100 | -0.24193600 |
| C    | -3.77205029 | -2.89835122 | -0.55556104 | S | 3.94792400  | -0.89971100 | 0.34074200  |
| C    | -2.95546922 | -1.86721714 | -0.11434301 | C | -5.52240600 | -0.84657500 | -0.02971500 |
| S    | -3.96418430 | -0.58742904 | 0.56944004  | C | -3.08783300 | -1.51741300 | 0.18249400  |
| H    | -5.93004444 | -3.37461726 | -0.64327205 | S | -3.98748500 | -0.10159600 | -0.37399300 |
| H    | -3.37818126 | -3.79359029 | -1.01471308 | N | 1.88858900  | 5.25808800  | -0.35845600 |
| C    | 5.43843142  | -1.46581811 | 0.27052702  | N | -0.77578800 | 5.52320600  | 0.25529100  |
| C    | 5.16365439  | -2.66137921 | -0.35165803 | N | 1.45651100  | 0.45712300  | -0.21618300 |
| C    | 3.77815429  | -2.88949722 | -0.55975604 | N | -1.28656700 | 0.72826000  | 0.16570900  |
| C    | 2.95991523  | -1.86050714 | -0.11660801 | N | 0.85384600  | -4.33442300 | -0.06925100 |
| S    | 3.96674330  | -0.57903004 | 0.56671505  | N | -1.62765600 | -4.09145900 | 0.04597700  |
| H    | 5.93707144  | -3.36092726 | -0.65090005 | C | -5.34964500 | -2.10152900 | 0.50656700  |
| H    | 3.38562526  | -3.78522029 | -1.01910908 | C | 4.87636200  | -3.11247900 | -0.59905300 |
| C    | 6.77530852  | -0.90130707 | 0.64925205  | H | 5.55874300  | -3.89006400 | -0.92593200 |
| H    | 6.96748755  | 0.05686200  | 0.15325001  | H | -6.17896300 | -2.72907000 | 0.80888100  |
| H    | 6.85280452  | -0.73143805 | 1.72920313  | C | -6.80582700 | -0.09058300 | -0.26381100 |
| H    | 7.56572460  | -1.59841112 | 0.35806503  | H | -7.01474700 | 0.54359100  | 0.60777200  |
| C    | -6.77188454 | -0.91589407 | 0.65627405  | H | -6.67167600 | 0.59365200  | -1.11652600 |
| H    | -6.84819952 | -0.74554806 | 1.73623513  | C | 6.71461800  | -1.46611300 | 0.17188100  |
| H    | -6.96688752 | 0.04155600  | 0.15998501  | H | 7.37095900  | -2.34391500 | 0.06973200  |
| H    | -7.56118659 | -1.61490412 | 0.36664003  | H | 6.99357600  | -0.76999300 | -0.62975300 |
| N    | -1.38056511 | 5.37655843  | -0.09352101 | N | -7.93886900 | -1.01080300 | -0.42144900 |
| N    | 1.36683811  | 5.38016044  | -0.08524501 | H | -8.80578400 | -0.48103200 | -0.46281700 |
| N    | -1.39232511 | 0.55326504  | -0.09963701 | H | -7.86070500 | -1.51770200 | -1.30057100 |
| N    | 1.39106710  | 0.55668104  | -0.09738401 | N | 6.87107700  | -0.74644000 | 1.44462000  |
| N    | -1.24299010 | -4.27677633 | -0.09789601 | H | 6.75890600  | -1.38623400 | 2.22839200  |
| N    | 1.25303310  | -4.27384332 | -0.09897501 | H | 7.80925200  | -0.35936800 | 1.51111500  |
|      |             |             |             | C | 3.46549500  | -3.20986900 | -0.71064100 |
|      |             |             |             | C | -3.98740900 | -2.48178700 | 0.61738600  |
|      |             |             |             | H | 2.95834100  | -4.07520400 | -1.11207400 |
|      |             |             |             | H | -3.66787100 | -3.43919900 | 1.00241000  |

**TDTP-2a**

|   |             |             |             |
|---|-------------|-------------|-------------|
| C | 0.73180100  | -2.99979600 | -0.11543600 |
| C | 1.48042200  | -1.79120200 | -0.13666700 |
| C | 0.72892200  | -0.59386900 | -0.11080700 |
| C | -0.72855600 | -0.59430100 | -0.11082000 |
| C | -1.47937400 | -1.79206800 | -0.13655300 |
| C | -0.73005200 | -3.00022700 | -0.11535300 |
| C | -0.72444300 | 1.72135400  | -0.10013500 |
| C | 0.72343300  | 1.72178800  | -0.09994000 |
| C | 1.44605600  | 2.99484400  | -0.09953900 |
| C | 0.73932900  | 4.22111800  | -0.08726400 |
| C | -0.74187200 | 4.22066300  | -0.08767600 |
| C | -1.44784400 | 2.99396100  | -0.10016400 |
| C | -2.70851100 | 5.42031300  | -0.08825400 |
| C | -3.49629900 | 4.25940700  | -0.10433200 |
| C | -2.85342600 | 3.03254100  | -0.11121700 |
| H | -3.17983600 | 6.40079400  | -0.08263800 |
| H | -4.57865300 | 4.33041800  | -0.11236100 |
| H | -3.40849000 | 2.10173900  | -0.12465300 |
| C | 2.85161800  | 3.03428800  | -0.10989200 |
| C | 3.49373600  | 4.26154800  | -0.10251300 |
| C | 2.70523200  | 5.42197200  | -0.08663500 |
| H | 3.40725900  | 2.10382900  | -0.12316700 |
| H | 4.57605000  | 4.33322100  | -0.10999200 |
| H | 3.17595700  | 6.40273900  | -0.08059900 |
| S | 0.00155700  | -5.27664900 | 0.03844600  |
| C | -5.37943100 | -1.58172200 | 0.20468400  |
| C | -4.97981600 | -2.57574600 | -0.65528400 |
| C | -2.94469000 | -1.82784300 | -0.17281200 |
| S | -3.96625200 | -0.74365600 | 0.77530400  |
| H | -5.66346300 | -3.23790800 | -1.17510200 |
| C | 5.38041400  | -1.57878400 | 0.20406400  |
| C | 4.98121500  | -2.57288700 | -0.65600300 |
| C | 2.94575500  | -1.82617200 | -0.17310600 |
| S | 3.96685800  | -0.74158800 | 0.77503800  |
| H | 5.66514600  | -3.23458900 | -1.17603300 |
| N | -1.37615900 | 5.40965600  | -0.08098600 |
| N | 1.37288100  | 5.41050700  | -0.08005200 |
| N | -1.39782300 | 0.59168800  | -0.11212900 |
| N | 1.39749000  | 0.59252200  | -0.11192000 |
| N | -1.25237100 | -4.24108800 | -0.03106300 |
| N | 1.25486600  | -4.24034600 | -0.03121300 |
| N | 3.63323400  | -2.71483900 | -0.85407500 |
| N | -3.63179000 | -2.71699100 | -0.85353600 |
| C | 6.77243500  | -1.19974300 | 0.60789200  |
| H | 7.49022300  | -1.85127900 | 0.10220800  |
| H | 7.00347200  | -0.16355800 | 0.33815100  |
| H | 6.92236900  | -1.30146800 | 1.68812400  |
| C | -6.77160100 | -1.20337900 | 0.60865800  |
| H | -7.00327500 | -0.16738800 | 0.33871700  |
| H | -7.48910300 | -1.85543900 | 0.10324500  |
| H | -6.92129400 | -1.30494000 | 1.68893900  |

**TDTP-2b**

|   |             |             |             |
|---|-------------|-------------|-------------|
| C | -0.73097600 | -3.02698700 | -0.00919900 |
| C | -1.49541200 | -1.82284300 | -0.03614000 |
| C | -0.72858500 | -0.62971000 | -0.03244800 |
| C | 0.72843000  | -0.62988600 | 0.03244300  |
| C | 1.49497200  | -1.82320100 | 0.03613200  |
| C | 0.73024700  | -3.02716300 | 0.00918300  |
| C | 0.71912800  | 1.69000000  | 0.07900500  |
| C | -0.71871600 | 1.69017500  | -0.07900800 |
| C | -1.43152400 | 2.96181000  | -0.21086500 |
| C | -0.73062900 | 4.18821400  | -0.11720800 |
| C | 0.73164900  | 4.18803600  | 0.11720800  |
| C | 1.43224600  | 2.96146000  | 0.21086300  |
| C | 2.66911600  | 5.39024300  | 0.44669300  |
| C | 3.44972500  | 4.23007400  | 0.56000700  |
| C | 2.81895600  | 3.00262800  | 0.44171200  |
| H | 3.13089000  | 6.37119900  | 0.53611100  |
| H | 4.51707000  | 4.30167600  | 0.73956900  |
| H | 3.37038400  | 2.07393500  | 0.52632500  |
| C | -2.81822500 | 3.00331600  | -0.44171600 |
| C | -3.44869300 | 4.23091600  | -0.56001300 |
| C | -2.66780200 | 5.39089400  | -0.44669700 |
| H | -3.36987900 | 2.07475900  | -0.52633200 |
| H | -4.51602000 | 4.30277900  | -0.73957700 |
| H | -3.12933600 | 6.37196300  | -0.53611700 |
| S | -0.00064400 | -5.31717400 | -0.00001000 |
| C | 5.39801700  | -1.52291600 | -0.18076000 |
| C | 3.77468700  | -2.89390400 | -0.45232500 |
| C | 2.95111600  | -1.85142400 | 0.06358200  |
| S | 3.98547200  | -0.54112500 | -0.49714300 |
| H | 3.41251100  | -3.83228000 | 0.84513500  |
| C | -5.39839200 | -1.52171900 | 0.18078400  |
| C | -3.77535700 | -2.89303900 | -0.45233700 |
| C | -2.95156300 | -1.85073800 | -0.06359100 |
| S | -3.98563700 | -0.54022500 | 0.49715500  |
| H | -3.41338200 | -3.83149100 | -0.84515200 |
| N | 1.35395400  | 5.37771900  | 0.23395900  |
| N | -1.35264300 | 5.37804900  | -0.23396100 |
| N | 1.38848000  | 0.55733600  | 0.11028800  |
| N | -1.38834400 | 0.55767400  | -0.11029300 |
| N | 1.24745600  | -4.27173900 | 0.00264100  |
| N | -1.24848900 | -4.27143600 | -0.00267000 |
| N | -5.12597100 | -2.70219000 | -0.32363600 |
| N | 5.12534200  | -2.70333600 | 0.32364100  |
| C | -6.78468300 | -1.01451600 | 0.43032000  |
| H | -7.02129800 | -0.16872100 | -0.22463200 |
| H | -7.49661000 | -1.81855900 | 0.23269100  |
| H | -6.90833900 | -0.67691000 | 1.46427000  |
| C | 6.78441800  | -1.01599700 | -0.43026800 |
| H | 7.02119600  | -0.17025800 | 0.22469700  |
| H | 7.49617500  | -1.82018900 | -0.23263500 |
| H | 6.90816000  | -0.67840600 | -1.46421200 |

**TDTP-3a**

|   |             |             |             |
|---|-------------|-------------|-------------|
| C | 1.13610700  | -2.80609000 | -0.16845600 |
| C | 1.69916200  | -1.50065800 | -0.17182100 |
| C | 0.78080700  | -0.42620400 | -0.14376100 |
| C | -0.66086200 | -0.64050300 | -0.14746600 |
| C | -1.22665200 | -1.93477300 | -0.18076200 |
| C | -0.30989600 | -3.02022800 | -0.17365200 |
| C | -0.99720600 | 1.64975500  | -0.12919300 |
| C | 0.43540100  | 1.86299700  | -0.12803900 |
| C | 0.96271400  | 3.22846900  | -0.12790400 |
| C | 0.08286200  | 4.33713200  | -0.11584500 |
| C | -1.38220600 | 4.11899100  | -0.11400300 |
| C | -1.90004800 | 2.80200100  | -0.12569000 |
| C | -3.50362400 | 5.01625900  | -0.10924700 |
| C | -4.11220800 | 3.75206200  | -0.12244500 |
| C | -3.29607100 | 2.63293200  | -0.13160600 |
| H | -4.11409600 | 5.91667900  | -0.10241200 |
| H | -5.19323200 | 3.66314800  | -0.12596000 |
| H | -3.70809900 | 1.63049400  | -0.14225500 |
| C | 2.34717500  | 3.47481100  | -0.13949800 |
| C | 2.80119200  | 4.78336400  | -0.13383100 |
| C | 1.85022100  | 5.81476600  | -0.11830500 |
| H | 3.03377800  | 2.63624400  | -0.15287200 |
| H | 3.86107000  | 5.01404500  | -0.14257600 |
| H | 2.17109200  | 6.85424000  | -0.11385700 |
| S | 0.74619100  | -5.16734700 | -0.05089200 |
| C | -5.10523500 | -2.30656500 | 0.18704000  |
| C | -2.67310000 | -2.18398000 | -0.20932800 |
| S | -3.82161900 | -1.30573200 | 0.79874900  |
| C | 5.51670200  | -0.72301700 | 0.22294500  |
| C | 3.15426200  | -1.31993600 | -0.19143800 |
| S | 3.99161600  | -0.11701600 | 0.79362100  |
| N | -2.18414600 | 5.20208900  | -0.10561300 |
| N | 0.53407300  | 5.60685300  | -0.11032400 |
| N | -1.49776300 | 0.43411900  | -0.14579000 |
| N | 1.26834800  | 0.84542900  | -0.14058200 |
| N | -0.64561300 | -4.32552100 | -0.10959200 |
| N | 1.83464200  | -3.95833300 | -0.09998900 |
| C | 5.28471900  | -1.74980400 | -0.65942900 |
| C | -4.58345800 | -3.18441100 | -0.73069900 |
| N | 3.97278300  | -2.08446900 | -0.87687300 |
| N | -3.23050100 | -3.12368600 | -0.94027200 |
| H | -5.17296800 | -3.90593600 | -1.28546000 |
| H | 6.06603200  | -2.29172200 | -1.17613000 |
| C | 6.83042600  | -0.12424800 | 0.65550200  |
| H | 6.97917000  | 0.82905100  | 0.13313400  |
| H | 6.78200800  | 0.11617500  | 1.72898700  |
| C | -6.53039700 | -2.17651100 | 0.64135700  |
| H | -7.12962900 | -2.87807600 | 0.04148800  |
| H | -6.61459400 | -2.50056000 | 1.68551200  |
| N | 7.94760100  | -1.00661200 | 0.30107500  |
| H | 8.82720400  | -0.52213500 | 0.45849800  |
| H | 7.95315700  | -1.82937300 | 0.90006300  |
| N | -6.99912000 | -0.78294800 | 0.57622700  |
| H | -7.07612200 | -0.48348600 | -0.39373000 |
| H | -7.93061900 | -0.71537900 | 0.97948200  |

**TDTP-3b**

|   |             |             |             |
|---|-------------|-------------|-------------|
| C | 0.65884100  | -3.05254700 | -0.00049900 |
| C | 1.44929100  | -1.86670700 | 0.05603400  |
| C | 0.71176300  | -0.65583400 | 0.02318600  |
| C | -0.74228900 | -0.62255600 | -0.08839900 |
| C | -1.53500700 | -1.79797600 | -0.12077000 |
| C | -0.80034000 | -3.01914200 | -0.07105600 |
| C | -0.67898400 | 1.69618400  | -0.12827500 |
| C | 0.75412600  | 1.66333300  | 0.06452800  |
| C | 1.49410000  | 2.91857400  | 0.20460600  |
| C | 0.82342500  | 4.16065800  | 0.09836500  |
| C | -0.63462900 | 4.19414400  | -0.15833100 |
| C | -1.36081400 | 2.98396200  | -0.26834700 |
| C | -2.53960800 | 5.44050900  | -0.51164600 |
| C | -3.34410700 | 4.29849200  | -0.64120400 |
| C | -2.74279800 | 3.05671100  | -0.51878000 |
| H | -2.97816700 | 6.43185700  | -0.60343700 |
| H | -4.40702500 | 4.39451400  | -0.83501600 |
| H | -3.31374000 | 2.14071300  | -0.61315400 |
| C | 2.87843100  | 2.92809200  | 0.45230300  |
| C | 3.53556600  | 4.14093600  | 0.57736800  |
| C | 2.78328300  | 5.31851700  | 0.45309800  |
| H | 3.40749100  | 1.98696900  | 0.54261800  |
| H | 4.60211900  | 4.18833500  | 0.76916100  |
| H | 3.26626000  | 6.28875500  | 0.54764900  |
| S | -0.12304700 | -5.32507600 | -0.04198200 |
| C | -5.42486900 | -1.42932000 | -0.02363100 |
| C | -3.81506900 | -2.80433700 | -0.66237400 |
| C | -2.99021800 | -1.79255500 | -0.20114300 |
| S | -4.01432400 | -0.48608600 | 0.38709400  |
| H | -3.45642600 | -3.73275400 | -1.08203000 |
| C | 5.35435600  | -1.67837700 | 0.00249700  |
| C | 3.67466300  | -2.98382400 | 0.60589600  |
| C | 2.90317600  | -1.93277100 | 0.13978000  |
| S | 3.99477600  | -0.66664000 | -0.41475900 |
| H | 3.26852900  | -3.89463900 | 1.02064800  |
| N | -1.22835900 | 5.39806600  | -0.27919300 |
| N | 1.47123300  | 5.33599000  | 0.22225900  |
| N | -1.37303800 | 0.57953800  | -0.18234100 |
| N | 1.39664200  | 0.51617000  | 0.11752900  |
| N | -1.34659600 | -4.25156900 | -0.08575100 |
| N | 1.14802000  | -4.30883000 | 0.00757600  |
| N | 5.03394400  | -2.83019400 | 0.54016500  |
| N | -5.16485400 | -2.59417400 | -0.56595600 |
| C | 6.76932700  | -1.23875300 | -0.25867900 |
| H | 7.08747800  | -1.66218600 | -1.21965200 |
| H | 7.40593000  | -1.69299000 | 0.51426400  |
| C | -6.81364000 | -0.88318900 | 0.16553800  |
| H | -7.13763500 | -0.42963600 | -0.77965500 |
| H | -7.48134700 | -1.73664800 | 0.35235800  |
| N | -6.84301300 | 0.15654400  | 1.19679100  |
| H | -7.70857200 | 0.68504200  | 1.13904100  |
| H | -6.80608100 | -0.25476000 | 2.12644300  |
| N | 6.86758200  | 0.21972500  | -0.35558600 |
| H | 6.84324800  | 0.64523400  | 0.56820700  |
| H | 7.75066100  | 0.48479800  | -0.78192500 |
